# Supplementary material for: Role of Ca2+ in the pepsin-induced coagulation and in the dynamic in vitro gastric digestion behavior of casein micelles
Source: Royal Society of Chemistry journal article supplement (doi:10.1039/d3fo01126g), 2023-01-01

## Appendix A. Supplementary Data

**Supplementary Fig. 1** The relationship between increased  $[\text{Ca}^{2+}]$  after the addition of  $\text{CaCl}_2$ .

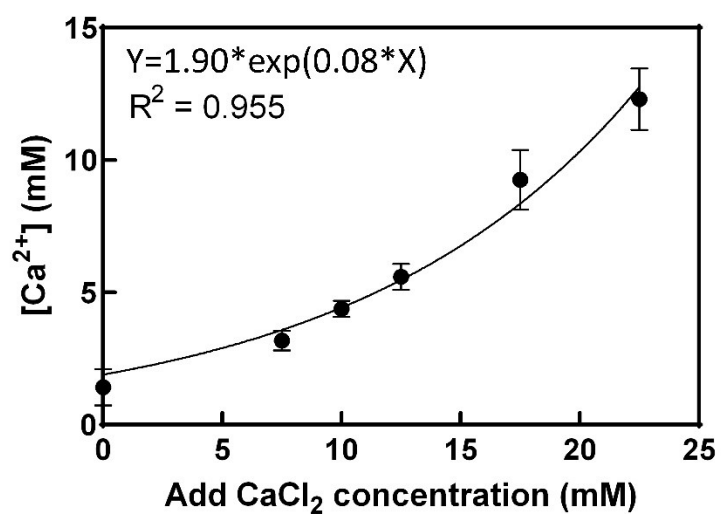

**Supplementary Fig. 2** Example of an overlay of UV chromatograms analyzing protein profiles before (–) and after the addition of pepsin at 5 min (–), 10 min (–), 30 min (–), and 120 min (–) for a micellar casein (MC) sample with the addition of  $\text{CaCl}_2$  at 17.5 mM at pH 6.0. All major milk proteins were identified.

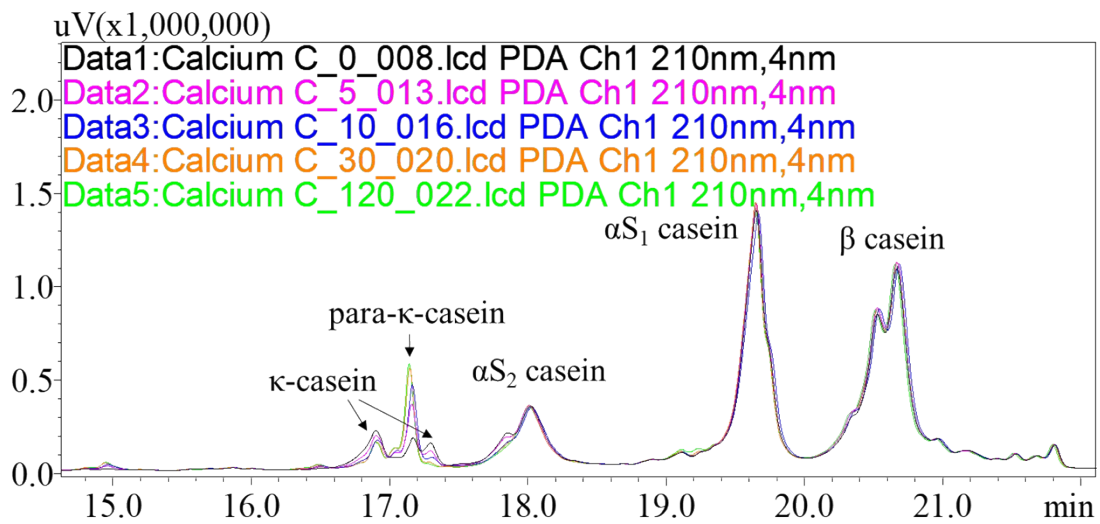

**Supplementary Fig. 3** (A) Overlay of UV chromatograms analyzing the protein profiles of a micellar casein (MC) solution (–) and the curd formed from an MC sample with the addition of  $\text{CaCl}_2$  at 17.5 mM (Ca-17.5): 20 min (–), 60 min (–), and 180 min (–). (B) Overlay of UV chromatograms analyzing the protein profiles of the MC solution (–) and the Ca-17.5 emptied digesta: 20 min (–), 40 min (–), 60 min (–), 120 min (–), 180 min (–).a

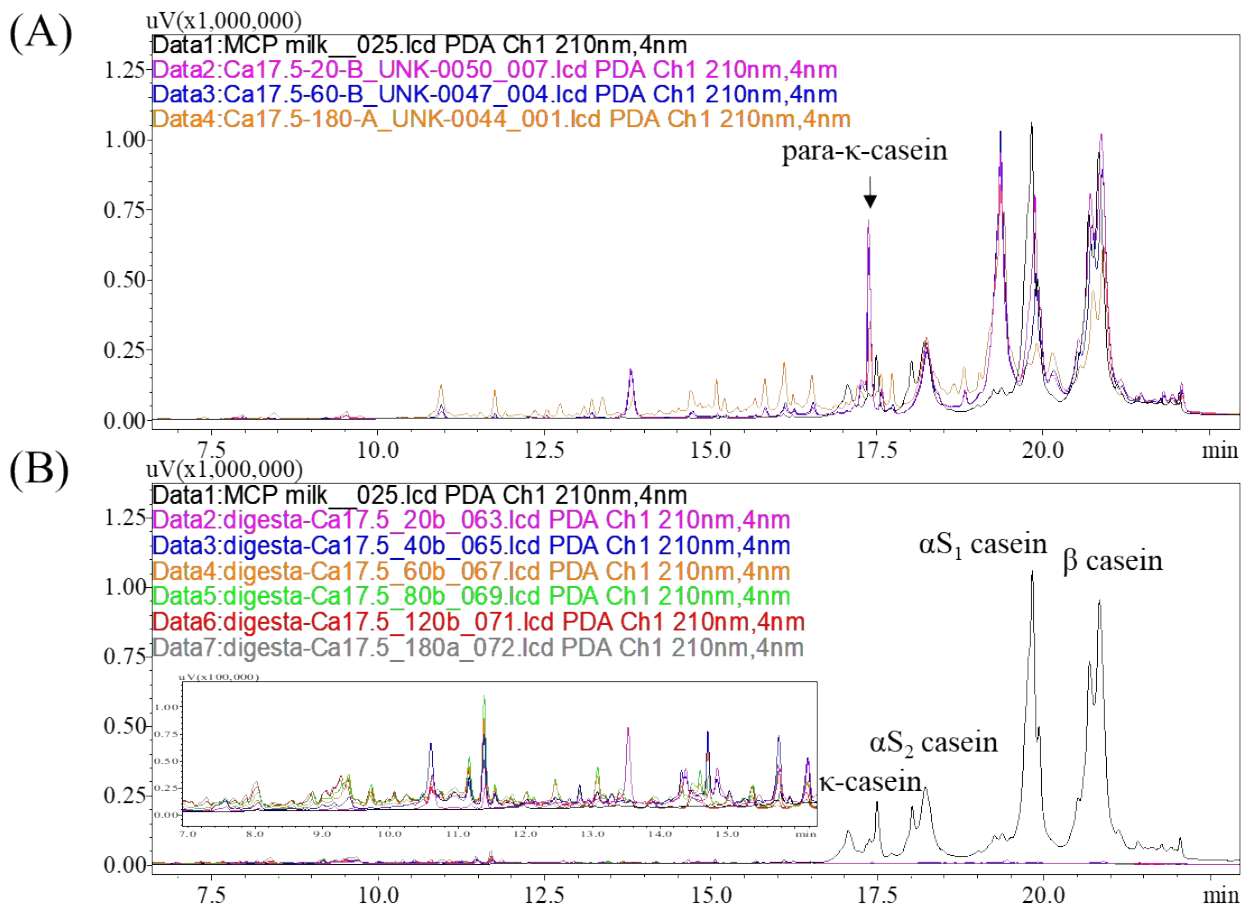

Supplement: d3fo01126g1.pdf [file d3fo01126g1.pdf]
